# Supplementary material for: Preparation and characterization of a copper oxide nanoparticle-supported red-mud catalyst for liquid phase oxidation of ethyl benzene to acetophenone
Source: Royal Society of Chemistry journal article supplement (doi:10.1039/d1nj00888a), 2021-01-01
Supplement: d1nj00888a1.pdf [file d1nj00888a1.pdf]

## Electronic Supplementary Information†

### Preparation and characterization of a copper oxide nanoparticle-supported red-mud catalyst for liquid phase oxidation of ethyl benzene to acetophenone †

Subhashree Mishra,<sup>a</sup> Simon Watre Sangma,<sup>a</sup> Rajaram Bal,<sup>b\*</sup> Ratan Kumar Dey <sup>a\*</sup>

<sup>a</sup>Department of Chemistry, Central University of Jharkhand (CUJ), Ranchi – 835 205, India,  
E-mail:rkdey@rediffmail.com; ratan.dey@cuja.ac.in, Tel:+91–671–2953002

<sup>b</sup>Catalytic Conversion & Processes Division, CSIR–Indian Institute of Petroleum (IIP),  
Dehradun–248005, India, E-mail: [raja@iip.res.in](mailto:raja@iip.res.in); Tel: +91–135–2525797.

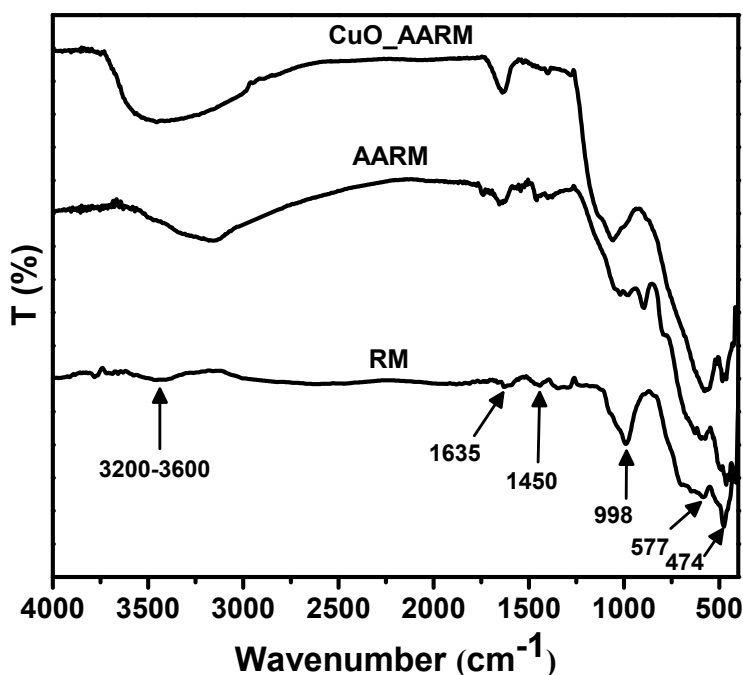

Fig. S1 FTIR spectra of RM, AARM and CuO\_AARM.

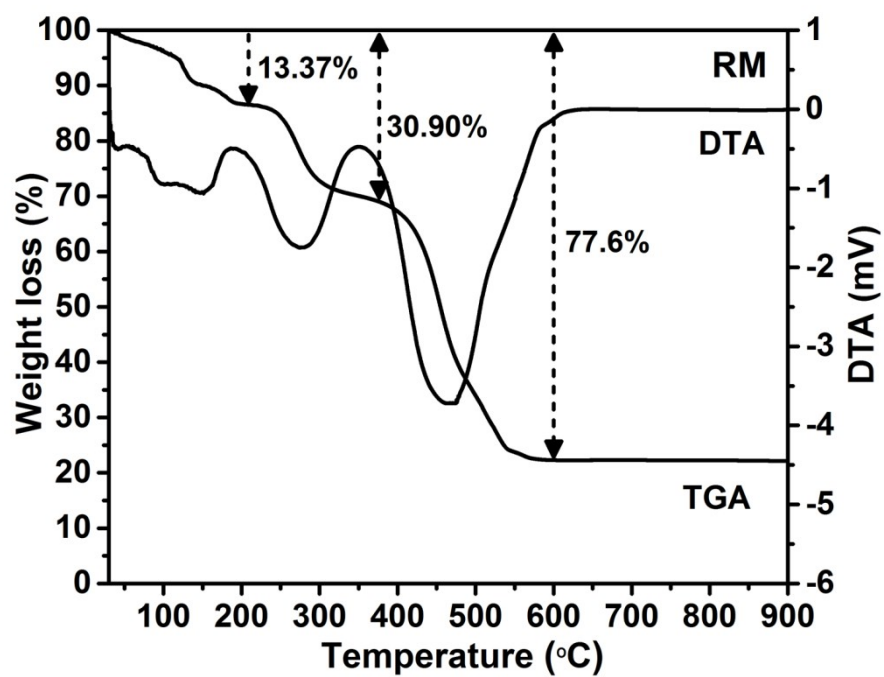

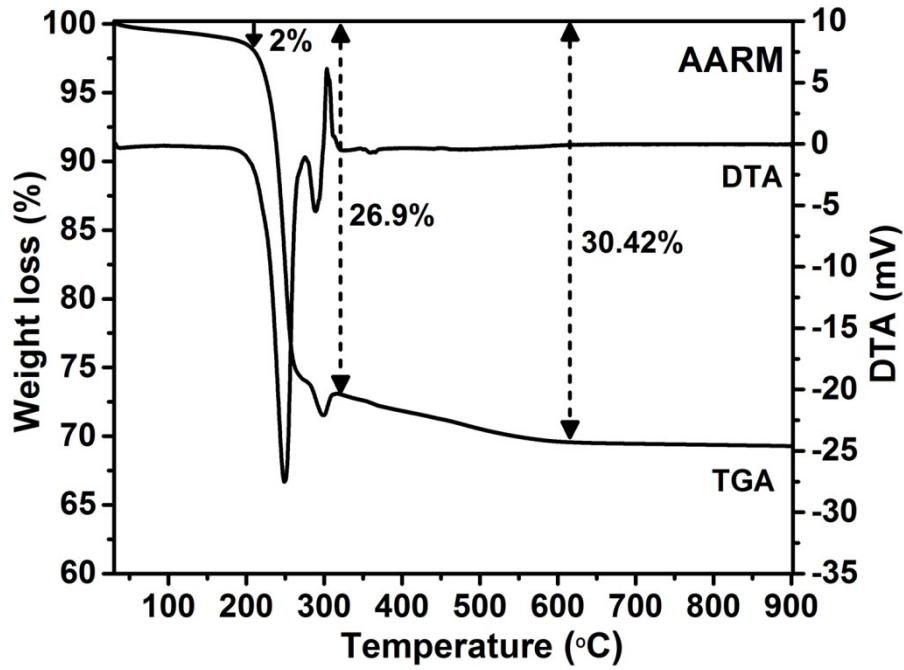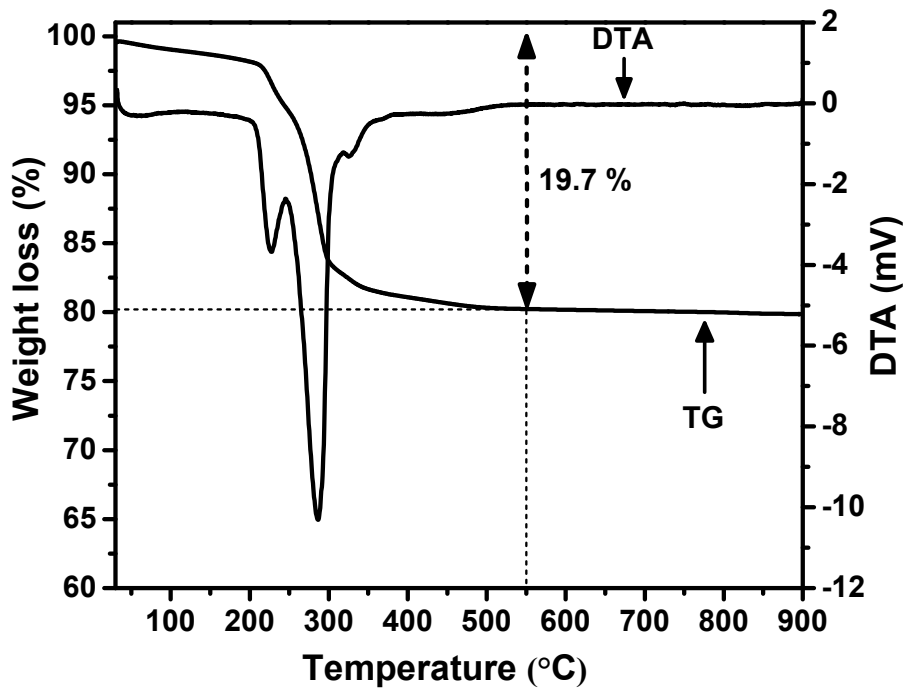

Fig. S2 DTA-TGA curve of RM and AARM and CuO\_AARM (uncalcined).

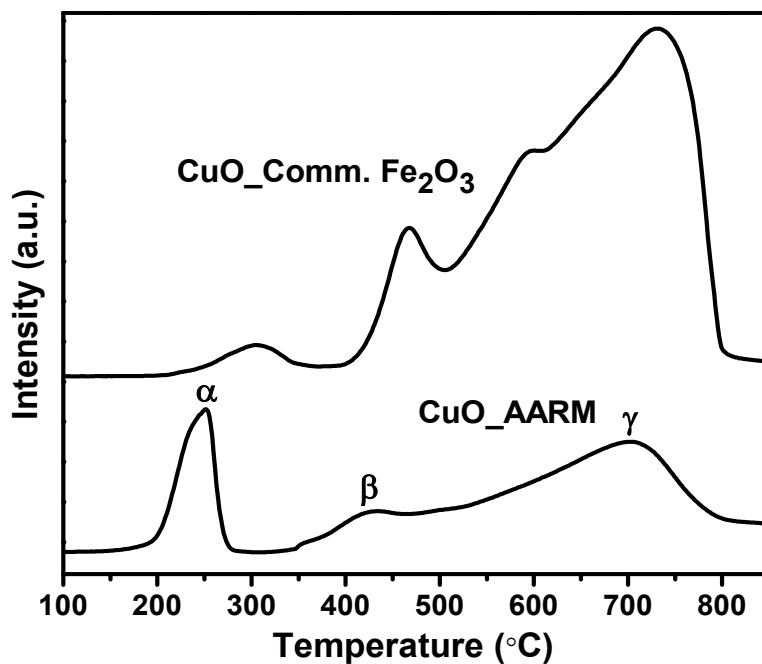

Fig. S3 H<sub>2</sub>-TPR analysis of CuO\_AARM and CuO\_Comm. Fe<sub>2</sub>O<sub>3</sub>.

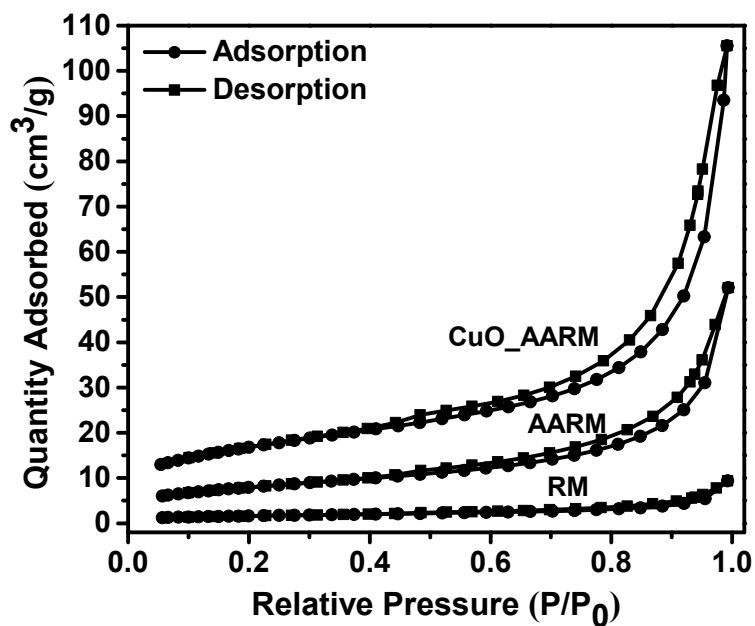

**Fig. S4** N<sub>2</sub> adsorption/desorption isotherms for RM, AARM, CuO\_AARM.

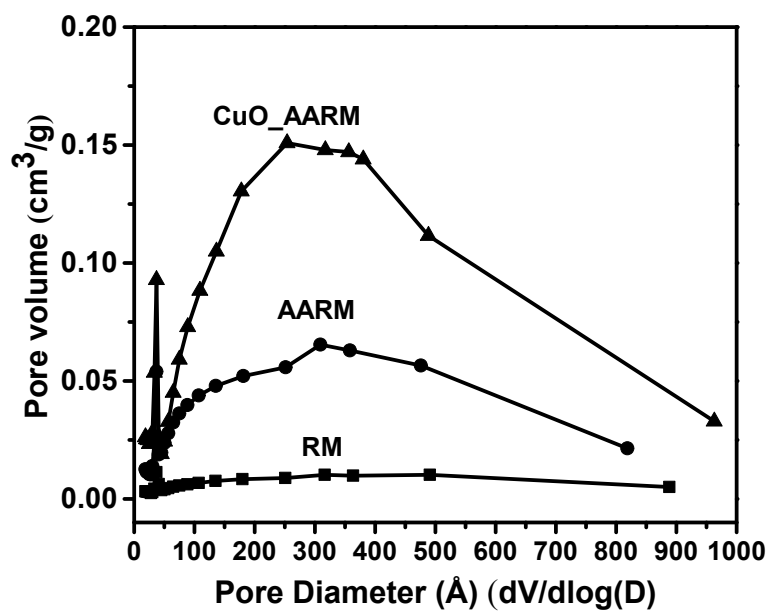

**Fig. S5** Distribution of pore diameters in RM, AARM and CuO\_AARM.

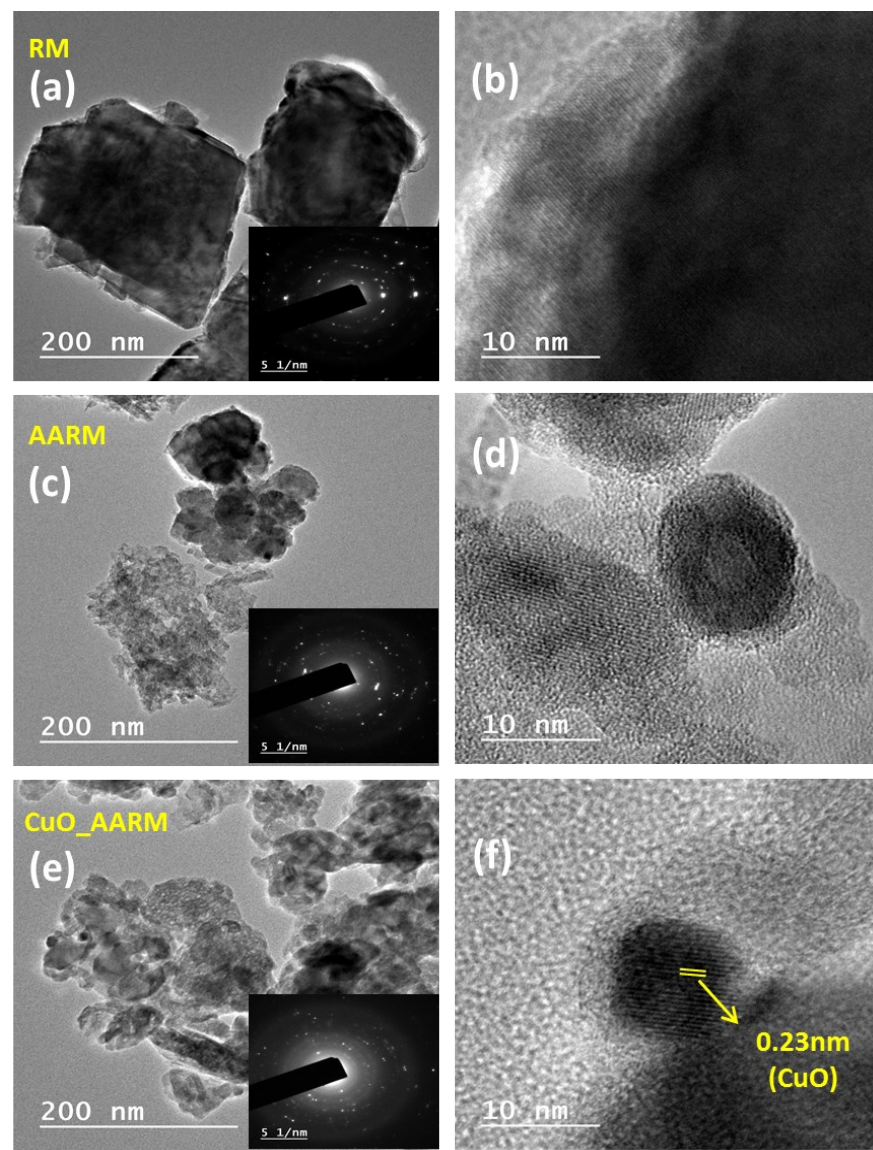

**Fig. S6** TEM images (a, c, & e) and HR-TEM (b, d, & f) of RM, AARM and CuO\_AARM respectively; the inset images of (a), (c), and (e) show the SAED pattern of the corresponding samples

**EDAX analysis and mapping of RM, AARM and CuO\_AARM (catalyst) materials**

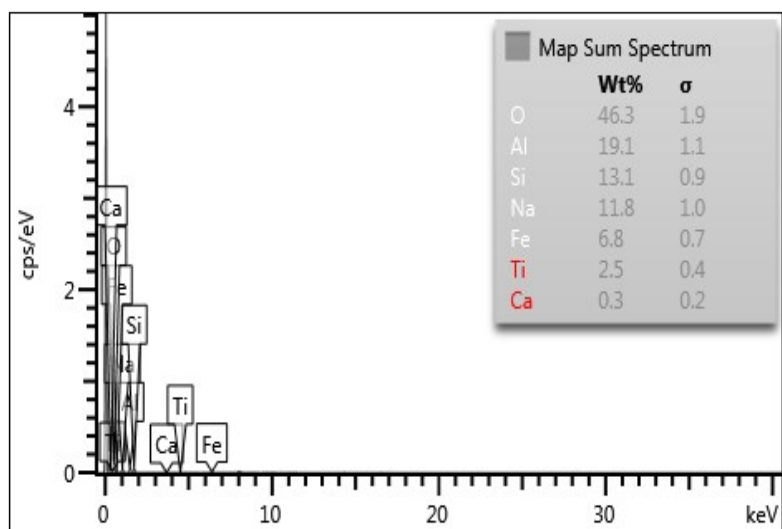

**Fig. S7(a)** Elemental analysis of Red Mud (RM)

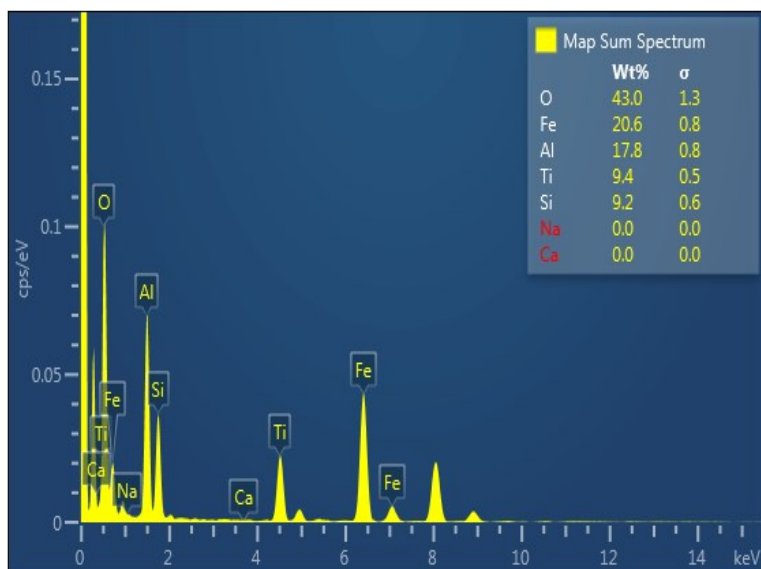

**Fig. S7(b)** Elemental analysis of AARM

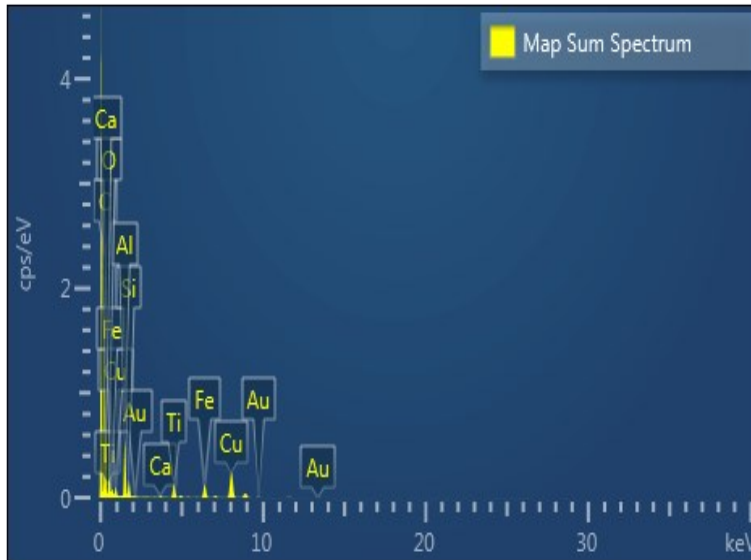

**Fig. S7(c)** Elemental analysis of CuO\_AARM



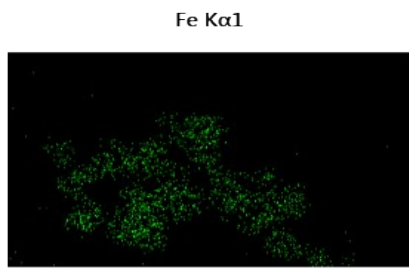

500nm

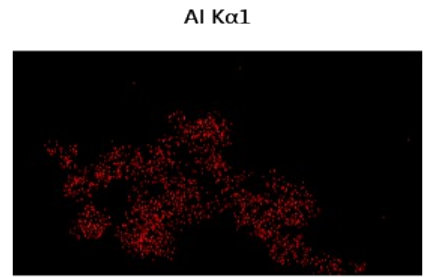

500nm

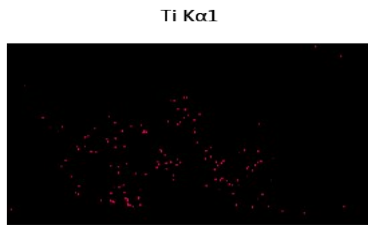

500nm

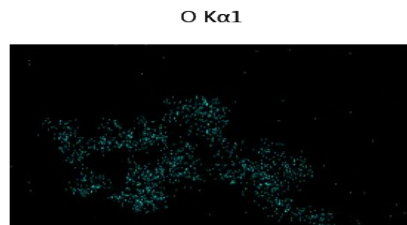

500nm

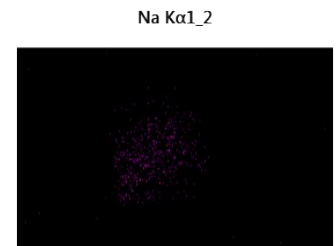

1 $\mu$ m

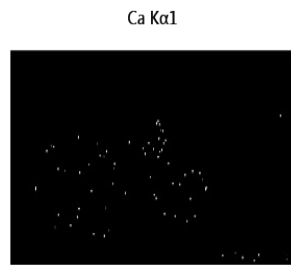

500nm

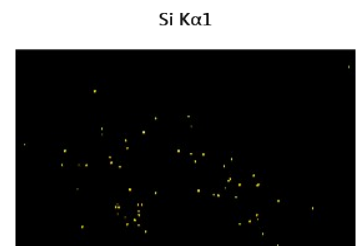

500nm

**Fig. S7(d)** Elemental mapping of RM

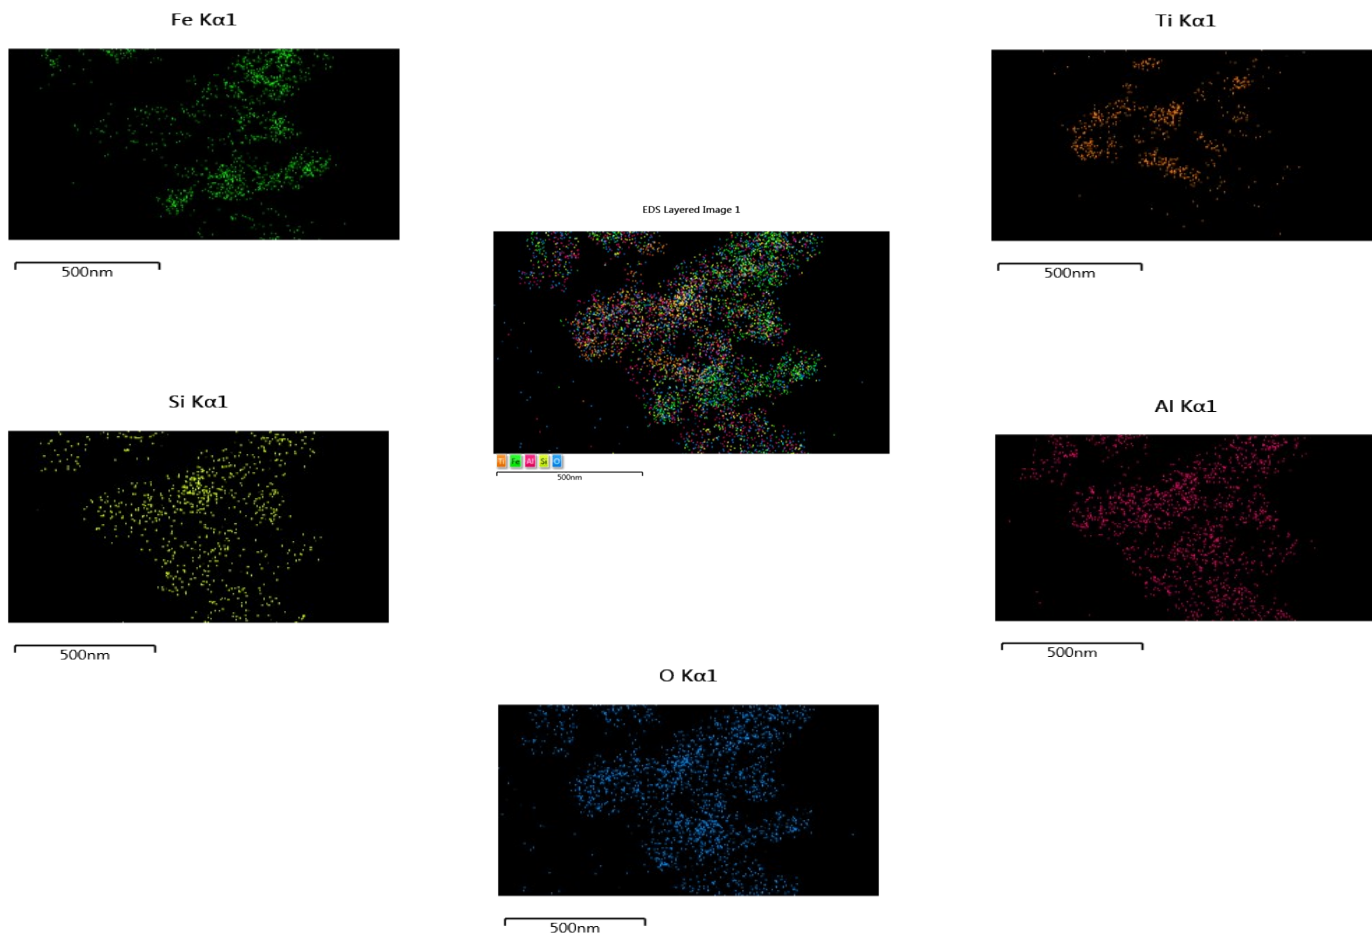

**Fig. S7(e)** Elemental mapping of AARM

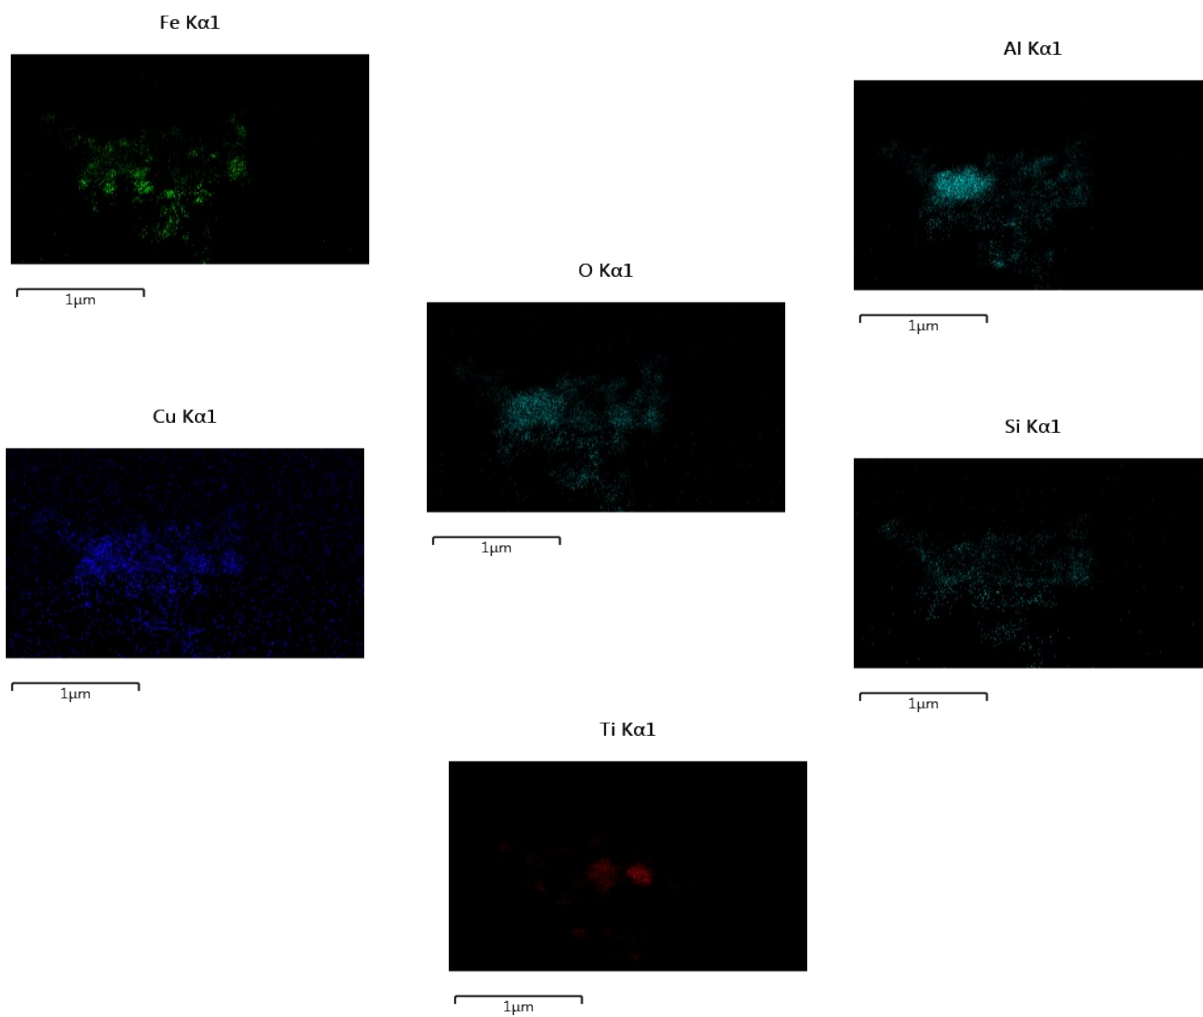

**Fig. S7(f)** Elemental mapping of CuO-AARM

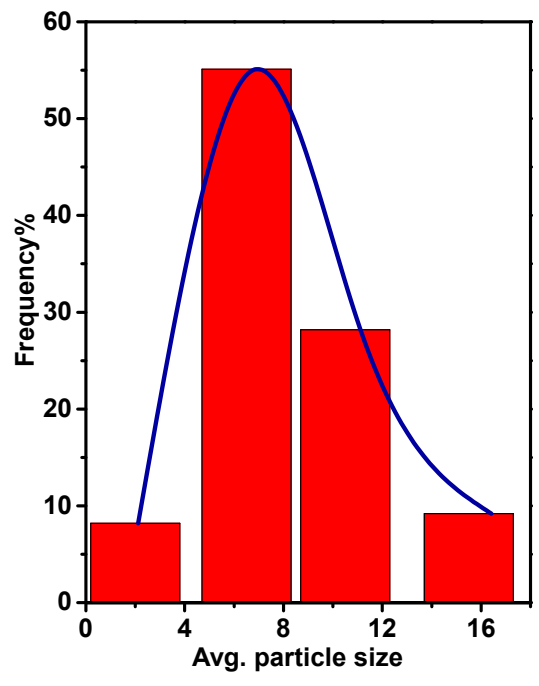

Fig. S8 Average particle size of CuO\_AARM

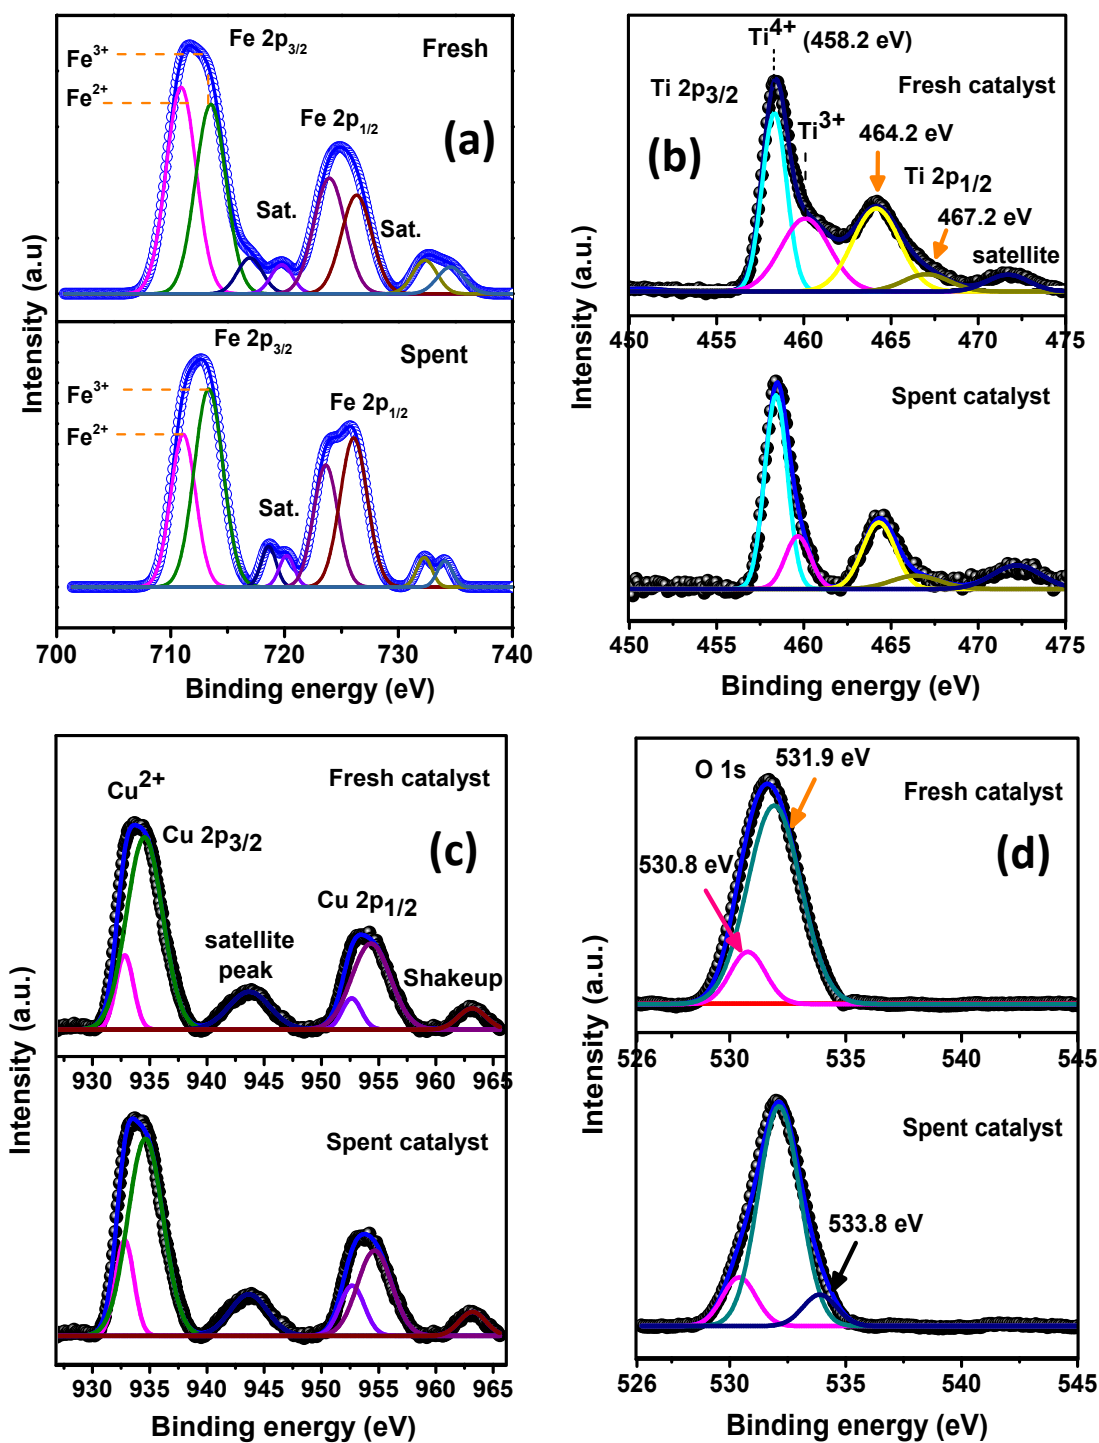

**Fig. S9** XPS spectra: deconvolution of (a) Fe 2p fresh and spent catalyst, (b) Ti 2p fresh and spent catalyst, (c) Fresh and spent catalyst of Cu 2p, and (d) fresh and spent spectra of O1s.

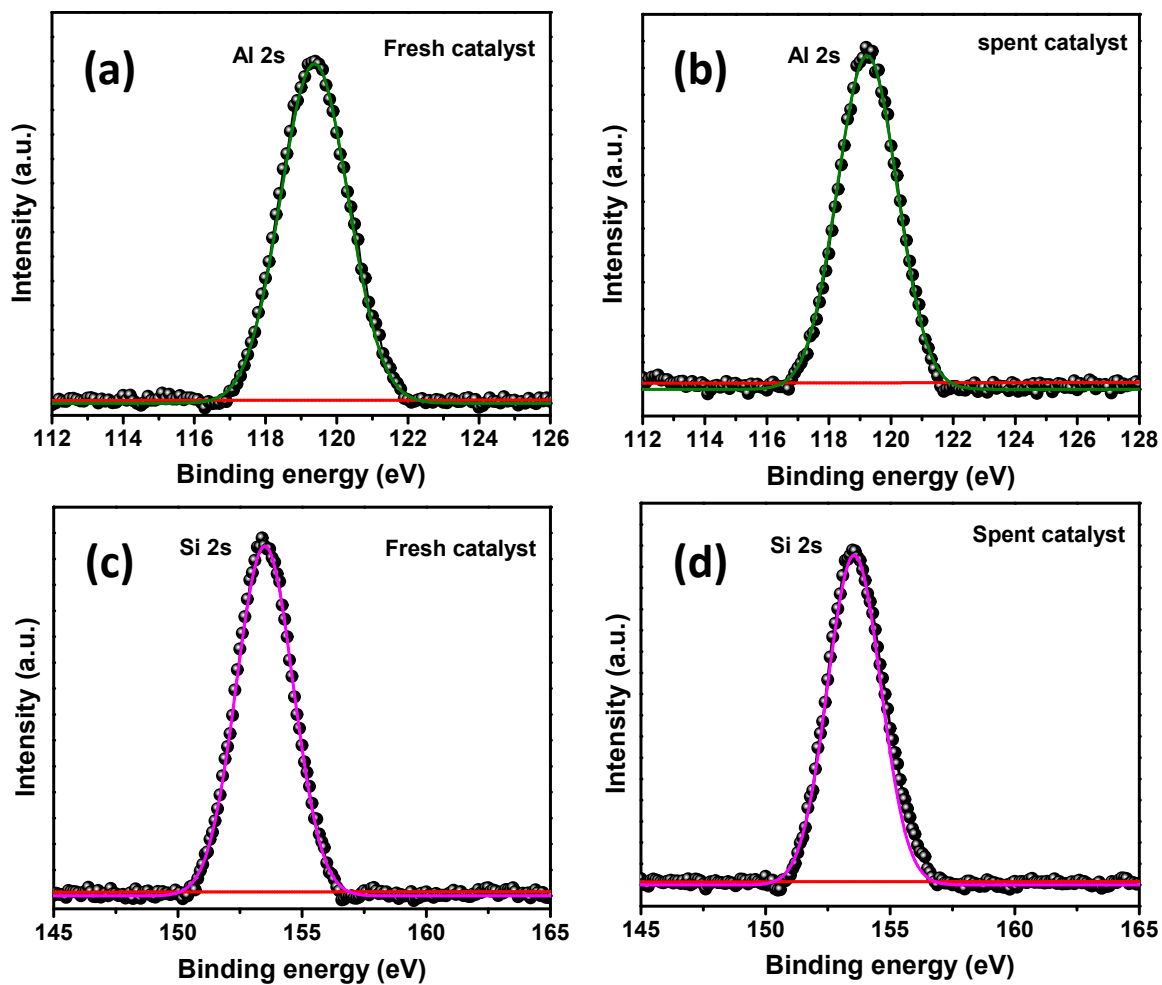

Fig. S10 XPS spectra of: Al 2s (a) fresh (b) spent catalyst; Si 2s (a) fresh (b) spent catalyst

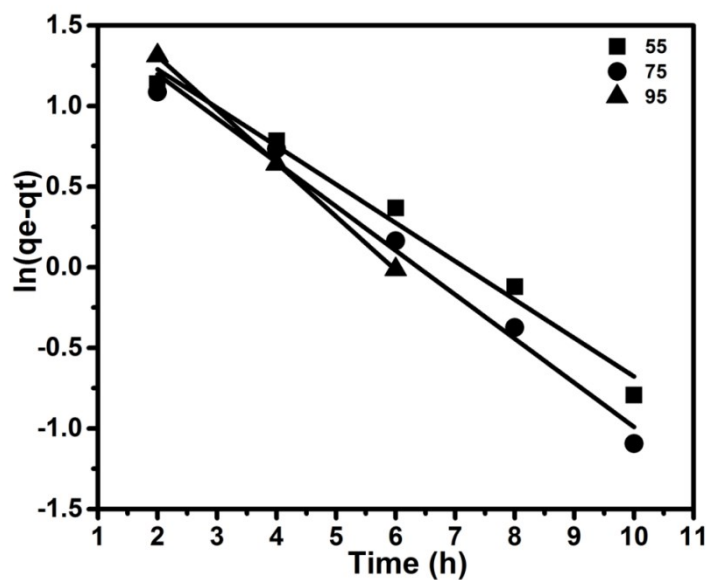

Fig. S11(a) Kinetic plot of  $\ln(q_e - q_t)$  vs.  $t$  (pseudo 1<sup>st</sup> order) at different temperatures

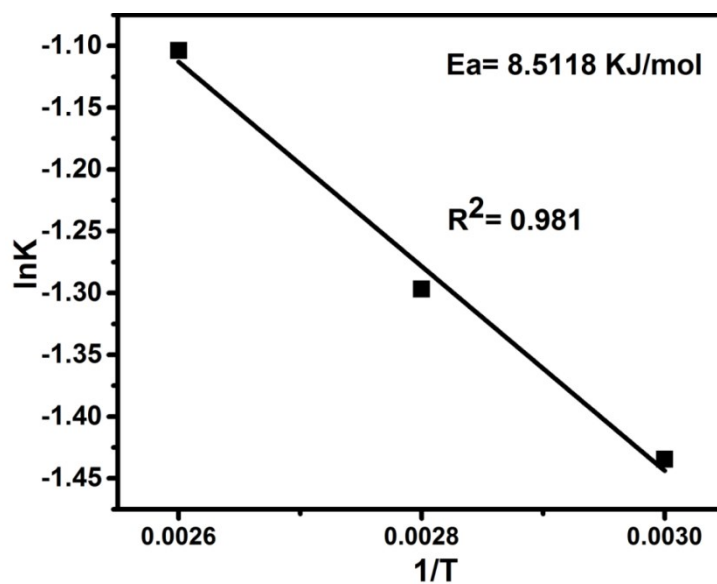

Fig. S11(b) Arrhenius plot (plot of  $\ln k_1$  vs.  $T^{-1}$ )

**Table S1.** Activities of catalyst with variation of solvents

| Catalyst        | Solvent                                 | Reaction condition                                             | Conversion | Selectivity of acetophenone | Selectivity of benzaldehyde |
|-----------------|-----------------------------------------|----------------------------------------------------------------|------------|-----------------------------|-----------------------------|
| <b>CuO_AARM</b> | Acetone                                 | 45 °C,<br>2mol, 50wt%<br>H <sub>2</sub> O <sub>2</sub> , 12h   | 22%        | 45%                         | 7%                          |
|                 | H <sub>2</sub> O                        | 75 °C,<br>2mol, 50 wt%<br>H <sub>2</sub> O <sub>2</sub> , 12h  | 47%        | 55%                         | 10%                         |
|                 | Acetonitrile                            | 75 °C,<br>2mol, 50 wt%<br>H <sub>2</sub> O <sub>2</sub> , 12h  | 86%        | 74%                         | 8.33%                       |
|                 | H <sub>2</sub> O and Acetonitrile (1:1) | 75 °C,<br>2 mol, 50 wt%<br>H <sub>2</sub> O <sub>2</sub> , 12h | 69%        | 68%                         | 10%                         |

**Table S2.** Comparative aspects with commercial materials (literature reported)

| Sl No. | Catalyst(s)                                                              | Solvent      | Reaction Condition(s)                            | Conversion/Selectivity/Yield (%) | Ref.         |
|--------|--------------------------------------------------------------------------|--------------|--------------------------------------------------|----------------------------------|--------------|
| 1      | Ag/ZnO                                                                   | Solvent-free | 80 °C, 1-mol H <sub>2</sub> O <sub>2</sub> , 7 h | 90/-/90                          | 13           |
| 2      | Pd/g-C <sub>3</sub> N <sub>4</sub> -rGO                                  | Acetonitrile | 80 °C, 4-mol TBHP, 24 h                          | 67/97/-                          | 6            |
| 3      | MnFeSi Composite                                                         | Acetone      | 50 °C, 1mol H <sub>2</sub> O <sub>2</sub> , 6 h  | 5.5/> 90/-                       | 9            |
| 4      | Co-Cu Mixed metal oxide                                                  | Solvent-free | 120 °C, 3-mol TBHP, 12 h<br>Nitrogen atmosphere  | 92.8/89.4/-                      | 16           |
| 5      | Phenyl group incorporated supported Co <sub>3</sub> O <sub>4</sub> oxide | Solvent-free | 120 °C, 10 bar, 6 h                              | 55.1/86.1/-                      | 43           |
| 6      | CuO_AARM                                                                 | Acetonitrile | 75°C, 2-mol H <sub>2</sub> O <sub>2</sub> 12 h.  | 86/74/-                          | Present work |



**Table S3.** The Thermodynamics table

| Sl. No. | Temperature (°C) | $\Delta G^\circ$ (J mol <sup>-1</sup> ) | $\Delta H^\circ$ (J mol <sup>-1</sup> ) | $\Delta S^\circ$ (J mol <sup>-1</sup> K <sup>-1</sup> ) |
|---------|------------------|-----------------------------------------|-----------------------------------------|---------------------------------------------------------|
| 1.      | 55               | -10217.3                                |                                         |                                                         |
| 2.      | 75               | -12393.7                                | 21430.0                                 | 96.7                                                    |
| 3.      | 95               | -14066.7                                |                                         |                                                         |

**Table S4.** DFT calculation table

|                               | <b>Vacuum (<math>E_h</math>)</b> | <b>Acetonitrile (<math>E_h</math>)</b> | <b>Solvation Energy (<math>E_h</math>)</b> |
|-------------------------------|----------------------------------|----------------------------------------|--------------------------------------------|
| 1                             | -310.658068                      | -310.6631656                           | -0.00509755                                |
| 2                             | -385.8751983                     | -385.885636                            | -0.01043773                                |
| 2'                            | -310.0303283                     | -310.0349634                           | -0.00463509                                |
| 3                             | -385.8703337                     | -385.8819787                           | -0.01164493                                |
| 3'                            | -310.0060882                     | -310.010919                            | -0.00483071                                |
| 4                             | -385.2179098                     | -385.228023                            | -0.01011317                                |
| 5                             | -345.4223515                     | -345.4320303                           | -0.00967878                                |
| 6                             | -115.6812063                     | -115.6896159                           | -0.00840953                                |
| 7                             | -461.0016336                     | -461.0156316                           | -0.013998                                  |
| 8                             | -384.7034132                     | -384.7139126                           | -0.0104994                                 |
| H <sub>2</sub> O <sub>2</sub> | -151.5466169                     | -151.5593912                           | -0.01277425                                |
| OH <sup>•</sup>               | -75.74340475                     | -75.75107048                           | -0.00766573                                |
| H <sub>2</sub> O              | -76.42241691                     | -76.43491747                           | -0.01250056                                |
| H <sub>2</sub>                | -1.17431929                      | -1.17468111                            | -0.00036182                                |
| H <sup>•</sup>                | -0.498762812                     | -0.498919271                           | -0.000156459                               |

|                |              |          |
|----------------|--------------|----------|
| 1 → 2'         | 81.12539416  | kcal/mol |
| 1 → 3'         | 96.21337121  | kcal/mol |
| S <sub>1</sub> | 367.6228145  | kcal/mol |
| S <sub>2</sub> | -16.46189488 | kcal/mol |
| S <sub>3</sub> | -89.45225946 | kcal/mol |
| S <sub>4</sub> | 20.23323811  | kcal/mol |
| S <sub>5</sub> | -66.52446072 | kcal/mol |
| S <sub>6</sub> | -161.5161849 | kcal/mol |

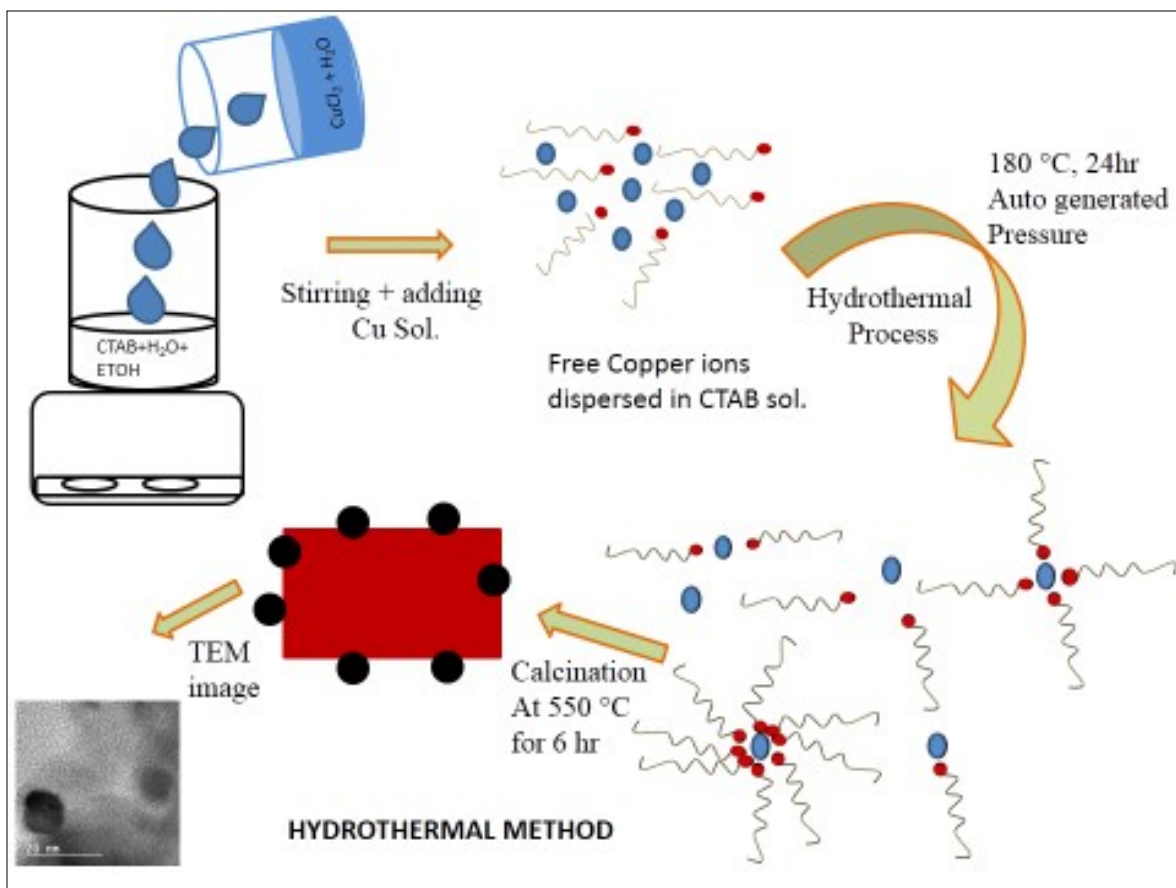

**Scheme S1.** Pictorial representation of synthesis procedure (hydrothermal technique)

**Scheme S2.** Decomposition of  $H_2O_2$  in presence of Fe

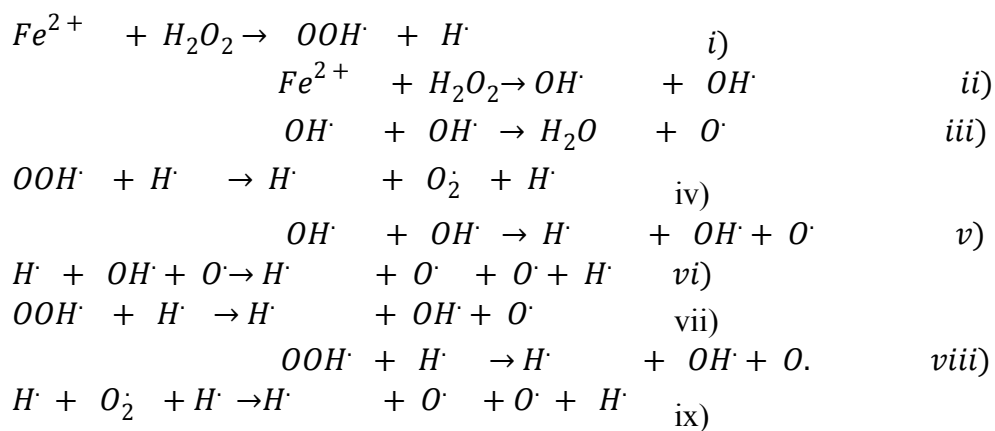

**Scheme S3.** Pictorial (videography) presentation of formation of acetophenone using DFT calculation.
